# Supplementary material
Source: PubMed Central journal article supplement (PMC2686138)
Supplement: blood-2008-04-152017_1.pdf [file blood-2008-04-152017_1.pdf]

| <b>Hematopoietic organ</b>                           | <b>HAT +/+</b> | <b>HAT -/-</b> | <b>P Value</b> |
|------------------------------------------------------|----------------|----------------|----------------|
| Spleen cellularity , x10 <sup>6</sup>                | 178.4 ± 30     | 100.8 ± 44     | 0.001          |
| Thymus cellularity, x10 <sup>6</sup>                 | 149 ± 29       | 97.5 ± 22      | 0.015          |
| Bone marrow cellularity, x 10 <sup>6</sup> /2 Femurs | 45.3 ± 12      | 29.2 ± 11      | 0.055          |
