# Supplementary material
Source: PubMed Central journal article supplement (PMC2686138)
Supplement: blood-2008-04-152017_2.pdf [file blood-2008-04-152017_2.pdf]

| Organ           | Cell Type                                                         | HAT+/+      | HAT+/-      | HAT-/-      | P Value |
|-----------------|-------------------------------------------------------------------|-------------|-------------|-------------|---------|
| <b>Thymus</b>   | CD4+                                                              | 7.7 ± 2     | 7.1 ± 1.1   | 8.5 ± 1.2   | 0.23    |
|                 | CD8+                                                              | 1.48 ± 0.5  | 1.5 ± 0.36  | 1.5 ± 0.2   | 0.64    |
|                 | CD4+/CD8+                                                         | 86.6 ± 2.26 | 88.2 ± 1.45 | 86.7 ± 2.1  | 0.47    |
| <b>B.Marrow</b> | Mature B cells (B220 <sup>high</sup> /IgM <sup>high</sup> )       | 7.06 ± 1.1  | 7.3 ± 1.2   | 8.7 ± 0.7   | 0.18    |
|                 | Immature B cells (B220 <sup>dim/high</sup> /IgM <sup>high</sup> ) | 6.4 ± 2     | 4.0 ± 1.13  | 2.95 ± 0.4  | 0.001   |
|                 | Pre/Pro-B cells (B220+/IgM-)                                      | 27.7 ± 7.7  | 21.96 ± 1.5 | 9.2 ± 2.8   | 0.0003  |
| <b>Spleen</b>   | Mature B cells (B220 <sup>high</sup> /IgM <sup>high</sup> )       | 54.0 ± 4.9  | 54.16 ± 4.9 | 55.2 ± 2.92 | 0.037   |
|                 | Immature B cells (B220 <sup>dim/high</sup> /IgM <sup>high</sup> ) | 14.3 ± 2.17 | 12.1 ± 6.27 | 9.21 ± 1.91 | 0.0005  |
|                 |                                                                   |             |             |             |         |
| <b>B.Marrow</b> | Ter119+/CD71 <sup>High</sup>                                      | 5.7 ± 1.2   | 5.5 ± 1.0   | 5.1 ± 1.5   | 0.38    |
|                 | Ter119+/CD71 <sup>Low</sup>                                       | 75.1 ± 8.4  | 73.5 ± 14.8 | 77.8 ± 2.7  | 0.35    |
| <b>B.Marrow</b> | CD45+/Mac1+                                                       | 17.3 ± 1.32 | 20.5 ± 2.6  | 21.7 ± 2.0  | 0.098   |
