# Supplementary material
Source: PubMed Central journal article supplement (PMC2686138)
Supplement: blood-2008-04-152017_3.pdf [file blood-2008-04-152017_3.pdf]

| Cell Type    | Phenotype                                                                                          | HAT+/+      | HAT+/-      | HAT-/-      | P Value |
|--------------|----------------------------------------------------------------------------------------------------|-------------|-------------|-------------|---------|
| <b>GMPs</b>  | Lin <sup>-</sup> Sca-1 <sup>-</sup> c-Kit <sup>+</sup> CD34 <sup>+</sup> FcγR III/II <sup>+</sup>  | 1.35 ± 0.2  | 0.79 ± 0.15 | 0.73 ± 0.13 | 0.024   |
| <b>CMPs</b>  | Lin <sup>-</sup> Sca-1 <sup>-</sup> c-Kit <sup>+</sup> CD34 <sup>+</sup> FcγR III/II <sup>lo</sup> | 2.46 ± 0.4  | 1.1 ± 0.13  | 0.9 ± 0.14  | 0.015   |
| <b>KLSFs</b> | Lin <sup>-</sup> Sca-1 <sup>-</sup> c-Kit <sup>+</sup> CD34 <sup>-</sup> FcγR III/II <sup>+</sup>  | 0.29 ± 0.04 | 0.17 ± 0.03 | 0.11 ± 0.02 | 0.007   |
| <b>MEPs</b>  | Lin <sup>-</sup> Sca-1 <sup>-</sup> c-Kit <sup>+</sup> CD34 <sup>-</sup> FcγR III/II <sup>lo</sup> | 7.6 ± 2.4   | 3.4 ± 0.5   | 3.3 ± 0.8   | 0.108   |
| <b>HSCs</b>  | Lin <sup>-</sup> IL-7Rα <sup>-</sup> Sca-1 <sup>+</sup> c-Kit <sup>+</sup>                         | 0.28 ± 0.03 | 0.19 ± 0.02 | 0.19 ± 0.01 | 0.0006  |
